# Supplementary material for: The RNA-binding protein HuR is required for maintenance of the germinal centre response
Source: PubMed Central journal article supplement (PMC8590059; doi:10.1038/s41467-021-26908-2), 2021-11-12
Supplement: 41467_2021_26908_MOESM1_ESM.pdf [file 41467_2021_26908_MOESM1_ESM.pdf]

## SUPPLEMENTARY MATERIAL

### **The RNA-binding protein HuR is required for maintenance of the germinal centre response.**

Ines C. Osma-Garcia<sup>1</sup>, Dunja Capitan-Sobrino<sup>1</sup>, Mailys Mouysset<sup>1</sup>, Sarah E. Bell<sup>2</sup>, Manuel Lebeurrier<sup>1</sup>, Martin Turner<sup>2\*</sup>, Manuel D. Diaz-Muñoz<sup>1, 2\*</sup>

<sup>1</sup> Toulouse Institute for Infectious and Inflammatory Diseases (Infinity), Inserm UMR1291, CNRS UMR5051, University Paul Sabatier, CHU Purpan, Toulouse, France

<sup>2</sup> Laboratory of Lymphocyte Signalling and Development, The Babraham Institute, Cambridge, UK.  
(email: [martin.turner@babraham.ac.uk](mailto:martin.turner@babraham.ac.uk)) (email: [manuel.diaz-munoz@inserm.fr](mailto:manuel.diaz-munoz@inserm.fr))

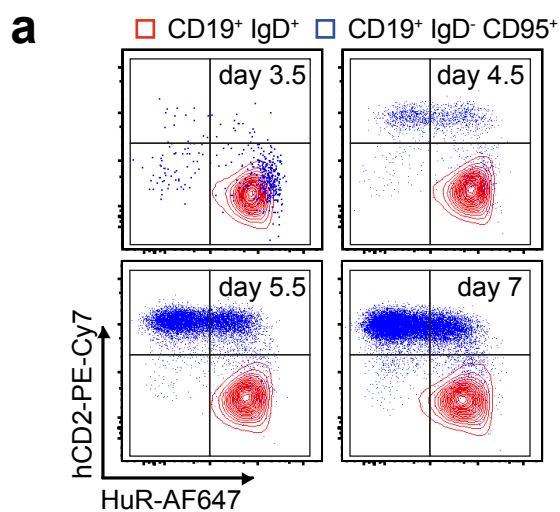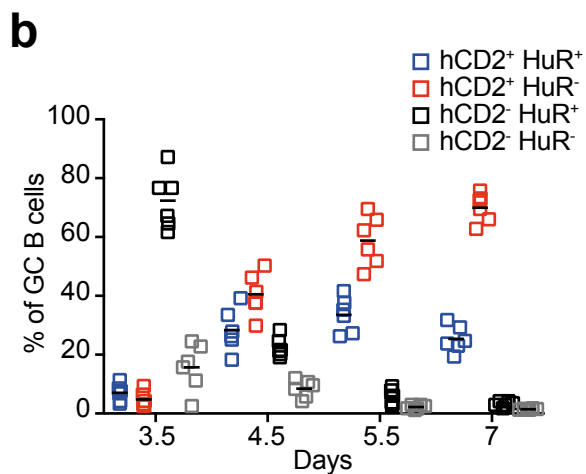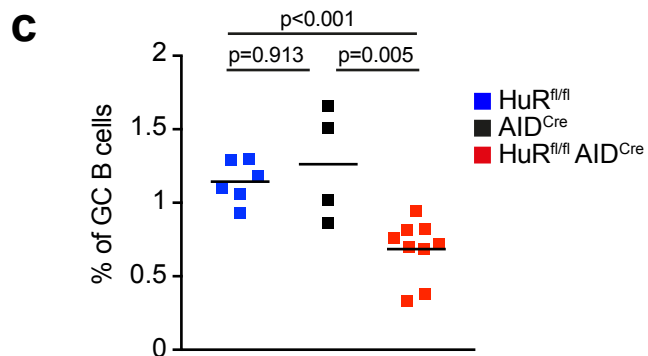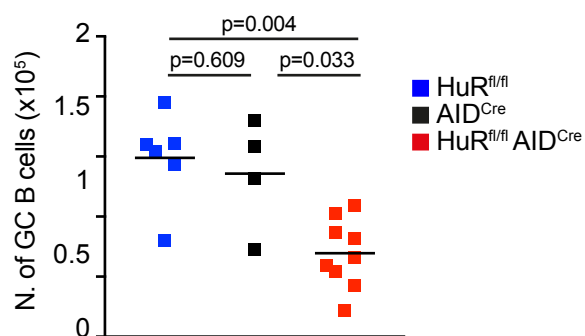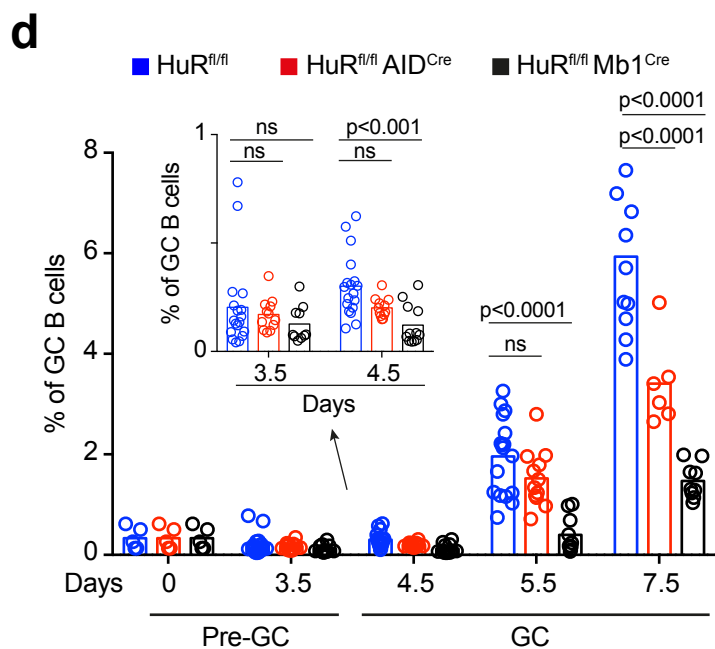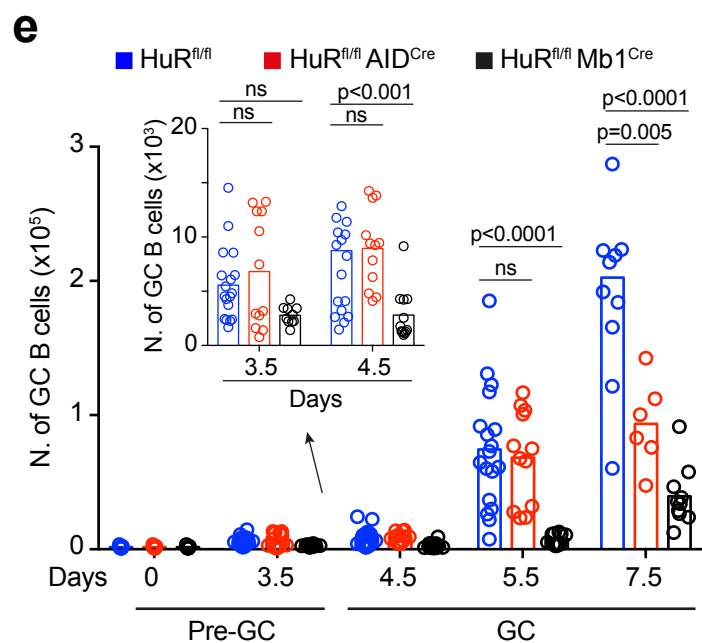

**Supplementary Figure 1. Establishment of the GC reaction is unaffected in  $\text{HuR}^{\text{fl/fl}}$   $\text{AID}^{\text{Cre}}$  mice.**

**a**, Representative FACs plots showing hCD2 reporter and HuR expression in  $\text{CD19}^+ \text{IgD}^+$  B cells and  $\text{CD19}^+ \text{IgD}^- \text{CD95}^+$  GC B cells in draining LNs from  $\text{HuR}^{\text{fl/fl}}$   $\text{AID}^{\text{Cre}}$  mice after s.c. hock immunisation with NP-KLH alum. **b**, Quantitation of the percentage of GC B cells expressing hCD2 and/or HuR in  $\text{HuR}^{\text{fl/fl}}$   $\text{AID}^{\text{Cre}}$  mice. Data from 1 of the 2 experiments performed, n=6 mice. **c**, Comparison of GC responses in  $\text{HuR}^{\text{fl/fl}}$ ,  $\text{AID}^{\text{Cre}}$ ,  $\text{HuR}^{\text{fl/fl}}$   $\text{AID}^{\text{Cre}}$  mice. Quantitation of the percentage (left panel) and the number (right panel) of  $\text{CD19}^+ \text{CD95}^+ \text{GL7}^+$  GC B cells in the spleen of mice at day 7 after immunisation with NP-KLH in alum. n=6  $\text{HuR}^{\text{fl/fl}}$  mice, n=4  $\text{AID}^{\text{Cre}}$  mice and n=9  $\text{HuR}^{\text{fl/fl}}$   $\text{AID}^{\text{Cre}}$  mice. **d**, Analysis of the percentage of GC B cells in LNs from  $\text{HuR}^{\text{fl/fl}}$ ,  $\text{HuR}^{\text{fl/fl}}$   $\text{AID}^{\text{Cre}}$  and  $\text{HuR}^{\text{fl/fl}}$   $\text{Mb1}^{\text{Cre}}$  mice at different days after immunisation (s.c.) with NP-KLH alum. **e**, Quantitation of the number of GC B cells in mice shown in d. Data in d-e is from 3 independent experiments. n=7-18 mice per group depending on the genotype and the day of analysis, Mann-Whitney test was performed for statistical analysis in c and 2-way Anova and multiple comparison corrected using Dunnet test was performed in d and e. Source data are provided as a Source Data file.

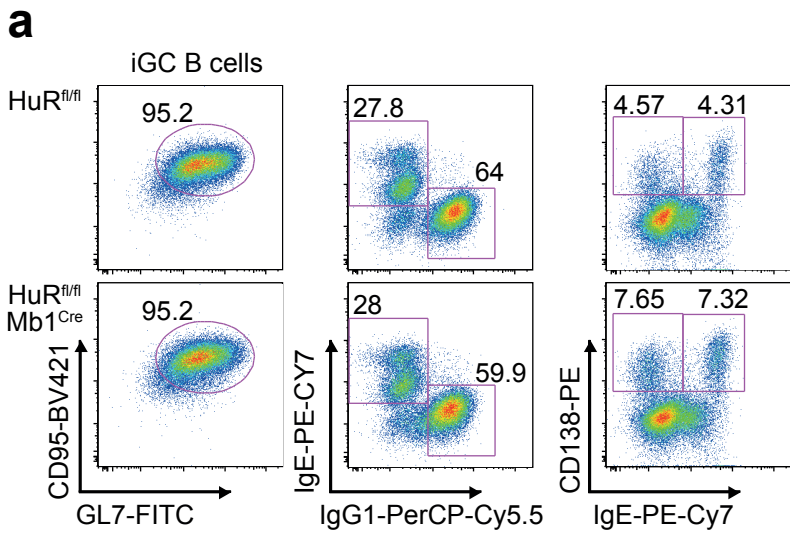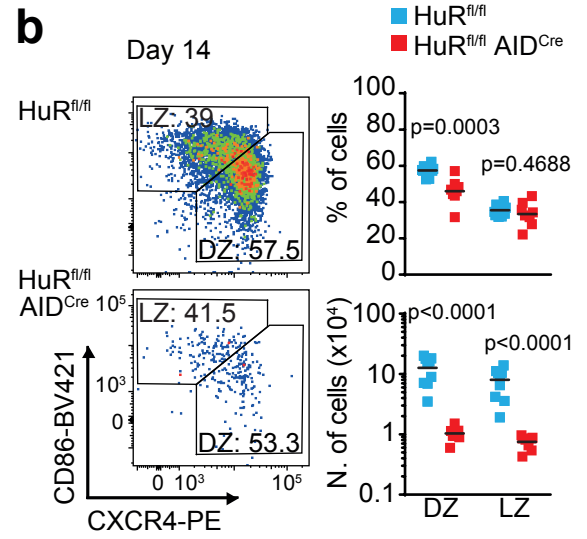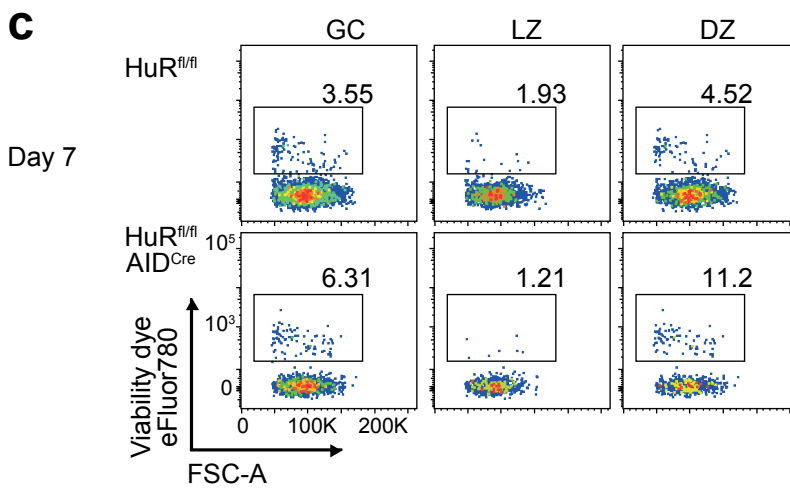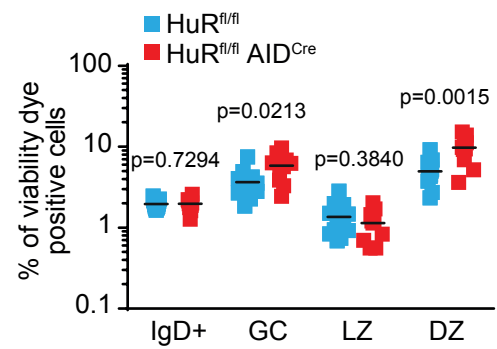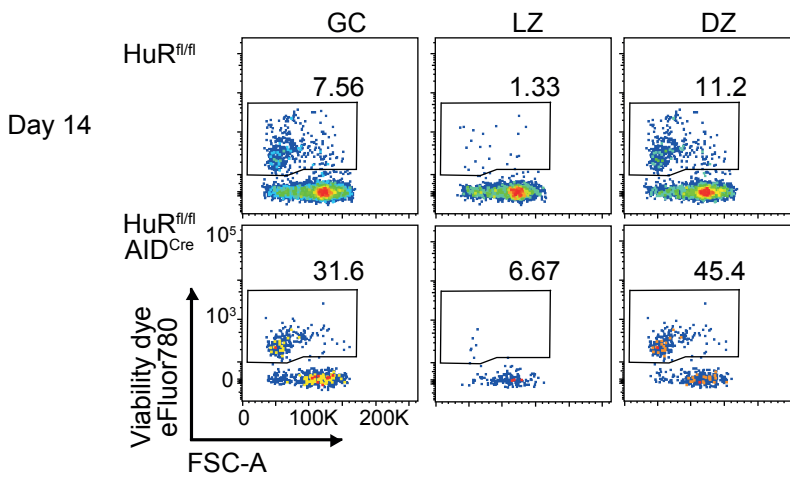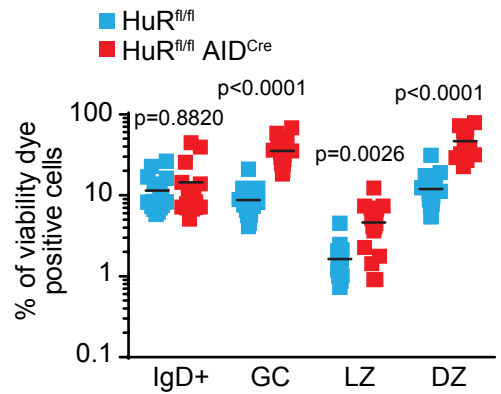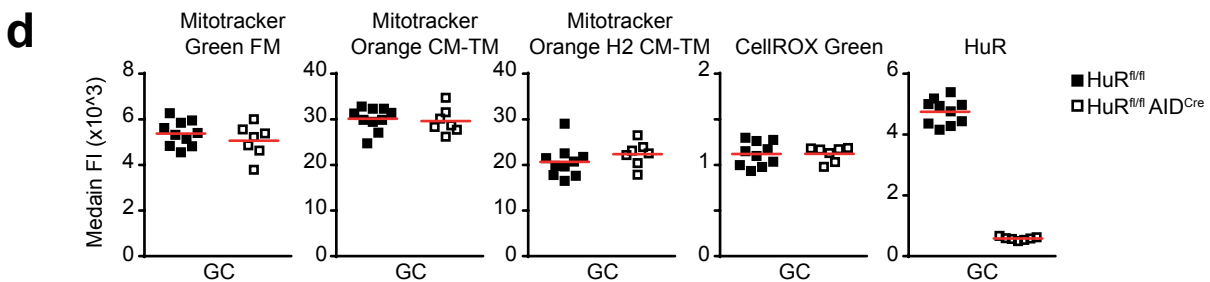

**Supplementary Figure 2. HuR is required for survival and DZ/LZ distribution of GC B cells.**

**a**, Phenotypic characterization of B cells co-cultured with 40LB stroma cells for 6 days in the presence of IL4 (from day 0 to day 4) and IL21 (from day 4 to day 6). Representative pseudo colour plots from 1 of the 2 independent experiments performed. FO B cells from 3 HuR<sup>fl/fl</sup> and 3 HuR<sup>fl/fl</sup> Mb1<sup>Cre</sup> mice were isolated, co-cultured and analysed independently in each experiment. **b**, Analysis of DZ and LZ GC B cells in the spleens of HuR<sup>fl/fl</sup> and HuR<sup>fl/fl</sup> AID<sup>Cre</sup> mice at day 14 after immunisation with NP-KLH alum. Left panels, representative contour plots of CXCR4<sup>+</sup> CD86<sup>-</sup> DZ B cells and CXCR4<sup>-</sup> CD86<sup>+</sup> LZ GC B cells (previously gated as CD19<sup>+</sup> IgD<sup>-</sup> CD38<sup>-</sup> CD95<sup>+</sup>). Right panels, percentage and number of DZ and LZ GC B cells (n=9 (HuR<sup>fl/fl</sup>) and n=8 (HuR<sup>fl/fl</sup> AID<sup>Cre</sup>) mice over 2 independent experiments, Mann-Whitney test). **c**, Representative pseudo colour plots showing staining with viability dye eFluor780 of different GC B cell populations in the spleen of HuR<sup>fl/fl</sup> and HuR<sup>fl/fl</sup> AID<sup>Cre</sup> mice at day 7 and 14 after immunisation with NP-KLH alum. Right panel, quantitation of the percentage of dead B cells in control and HuR<sup>fl/fl</sup> AID<sup>Cre</sup> mice. Data from 3 experiments performed with at least n=4 mice per group in each experiment, 2-way ANOVA and Bonferroni's post-test. **d**, Quantitation of mitochondrial mass (MitoTracker Green FM), mitochondrial membrane potential (MitoTracker Orange CM-TM), mitochondrial respiratory capacity (MitoTracker Orange H2-CM-TM) and ROS production (CellROX Green) by flow cytometry. Source data are provided as a Source Data file.

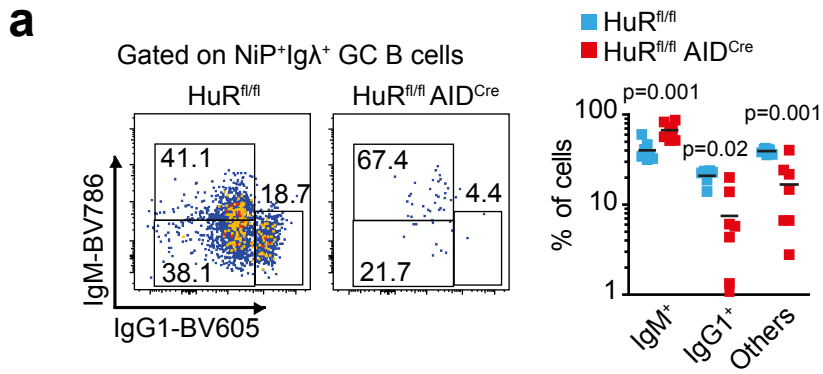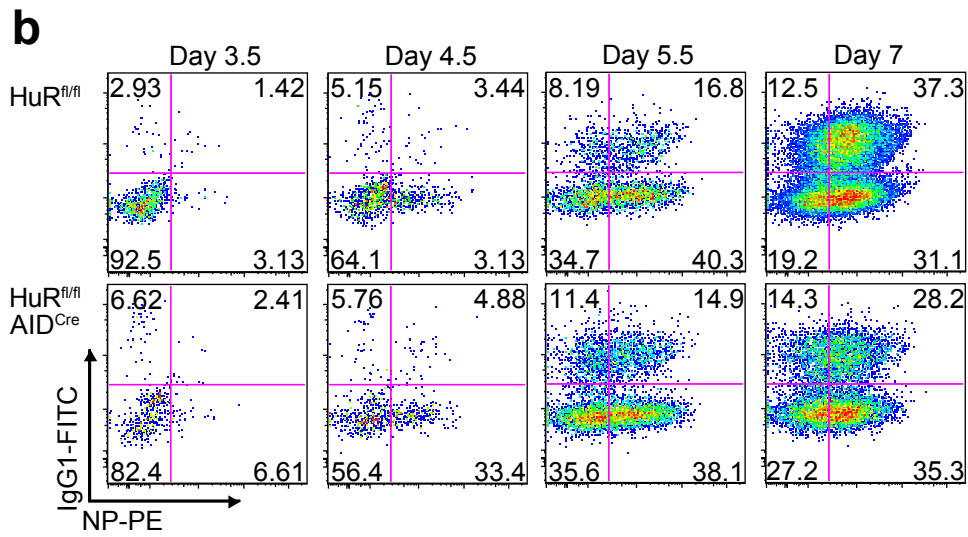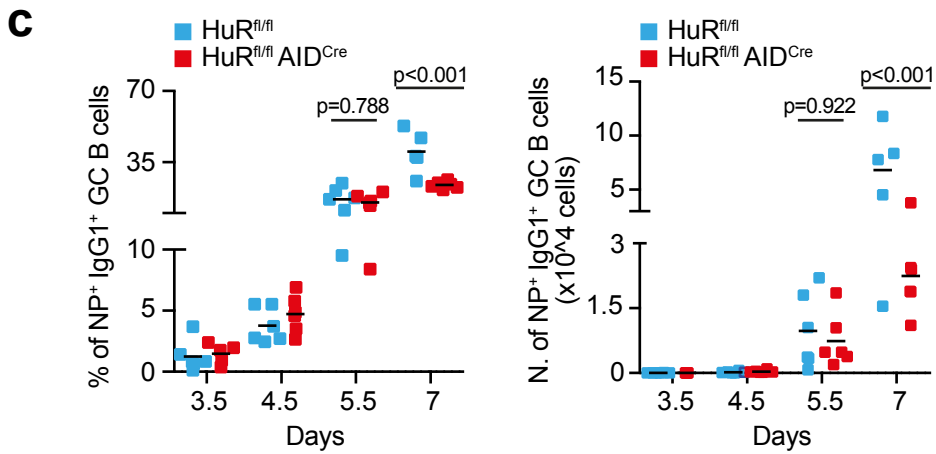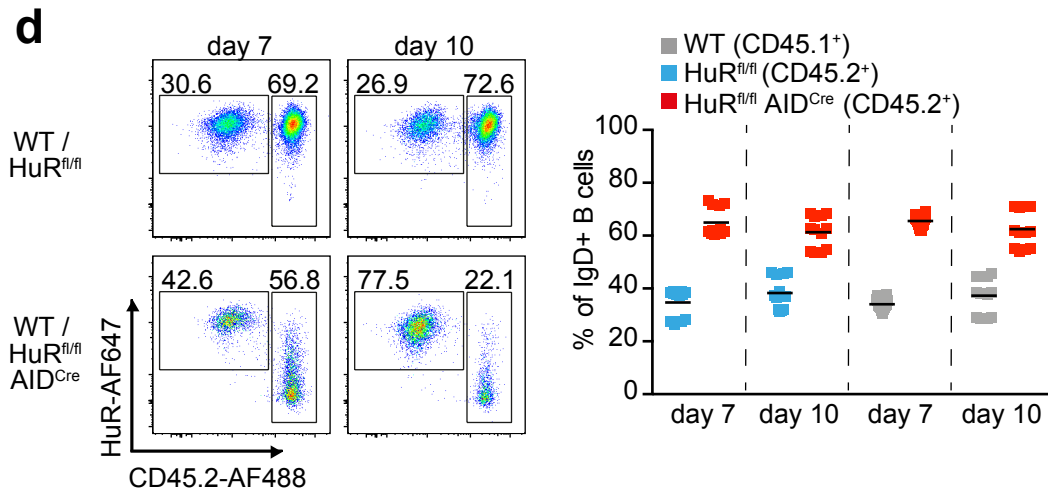

**Supplementary Figure 3. HuR is dispensable for the appearance of antigen-specific GC B cells.**

**a**, Analysis of the Ig isotype of Ig $\lambda$ <sup>+</sup> NiP<sup>+</sup> GC B cells found in the spleen of HuR<sup>fl/fl</sup> and HuR<sup>fl/fl</sup> AID<sup>Cre</sup> mice at day 14 after immunisation with NP-KLH in alum. Left panels, representative pseudo colour plots of IgM and IgG1 expression by Ig $\lambda$ <sup>+</sup> NiP<sup>+</sup> GC B cells (previously gated on CD19<sup>+</sup> IgD<sup>-</sup> CD38<sup>-</sup> CD95<sup>+</sup>). Right panels, percentage of IgM<sup>+</sup>, IgG1<sup>+</sup> and IgM<sup>-</sup> IgG1<sup>-</sup> (others) GC B cells (data representative from 1 of the 2 independent experiments performed, n=7 mice per group, Mann-Whitney test). **b**, Analysis of NP- binding GC B cells (gated as CD19<sup>+</sup> IgD<sup>-</sup> CD95<sup>+</sup> cells) in draining LNs of of HuR<sup>fl/fl</sup> and HuR<sup>fl/fl</sup> AID<sup>Cre</sup> mice after immunisation with NP-KLH in alum. Representative dot plots from 1 of the 2 independent experiment performed are shown. **c**, Quantitation of the percentage (left panel) and the number (right panel) of NP+ IgG1+ GC B cells shown in b. Data are representative from 1 of the 2 experiments performed, n=5 or 6 mice per group depending on the genotype and the day of analysis (2-way ANOVA and Bonferroni's post-test). **d**, Analysis of the proportion of CD45.2<sup>-</sup> and CD45.2<sup>+</sup> B cells (gated as CD19<sup>+</sup> IgD<sup>-</sup>) in draining LNs of BM chimera mice (WT CD45.1<sup>+</sup> / HuR<sup>fl/fl</sup> CD45.2<sup>+</sup> or CD45.1<sup>+</sup> / HuR<sup>fl/fl</sup> AID<sup>Cre</sup> CD45.2<sup>+</sup>, ratio 1:3) shown in Figure 3c. Data are from n=12 or 16 mice per group depending on the genotype and the day of analysis. Source data are provided as a Source Data file.





**Supplementary Figure 4. Myc over-expression does not rescue GCs in HuR<sup>fl/fl</sup> AID<sup>Cre</sup> mice.**

**a**, *CD69* and *Bcl6* mRNA expression in the cell populations described in figure 4a (n=3 samples per condition, DESeq2 analysis, BH correction of p-values). **b**, *Elavl1*, *Myc*, *Tfap4* and *CD69* mRNA levels in selected (*Myc*<sup>+</sup> AP4<sup>+</sup>) and non-selected (*Myc*<sup>-</sup> AP4<sup>-</sup>) LZ GC B cells by Tfh cells; and in AP4<sup>+</sup> and AP4<sup>-</sup> DZ B cells (GSE80669 (Chou et al., 2016), n=3 samples per group, mean±SD, DESeq2 analysis). Data in a-b are presented as mean values +/- SEM. **c**, Expression of HuR in splenic WT FO B cells stimulated or not with IL-4, αCD40+IL4, αIgM+IL4 or αCD40+αIgM+IL4 with the mitogens and cytokines indicated (n=22 mice from 5 independent experiments performed each with at least n=3 biological replicates per group). **d**, Phenotypic characterization of GC responses in B6.SJL mice reconstituted with HuR<sup>fl/fl</sup>, HuR<sup>fl/fl</sup> AID<sup>Cre</sup>, HuR<sup>fl/fl</sup> Rosa26-Myc and HuR<sup>fl/fl</sup> Rosa26-Myc AID<sup>Cre</sup> bone marrow at day 14 after immunisation with NP-KLH (n=6 for mouse groups HuR<sup>fl/fl</sup>, HuR<sup>fl/fl</sup> AID<sup>Cre</sup> and HuR<sup>fl/fl</sup> Rosa26-Myc, and n=4 for HuR<sup>fl/fl</sup> Rosa26-Myc AID<sup>Cre</sup> mouse group, Mann-Whitney test, \*p<0.05, \*\*p<0.01, \*\*\*p<0.001, \*\*\*\*p<0.0001). Source data are provided as a Source Data file.

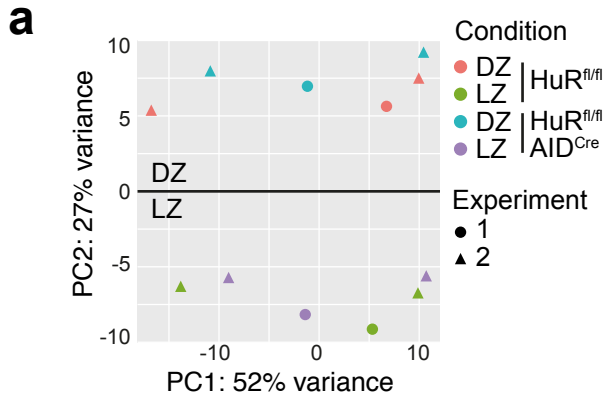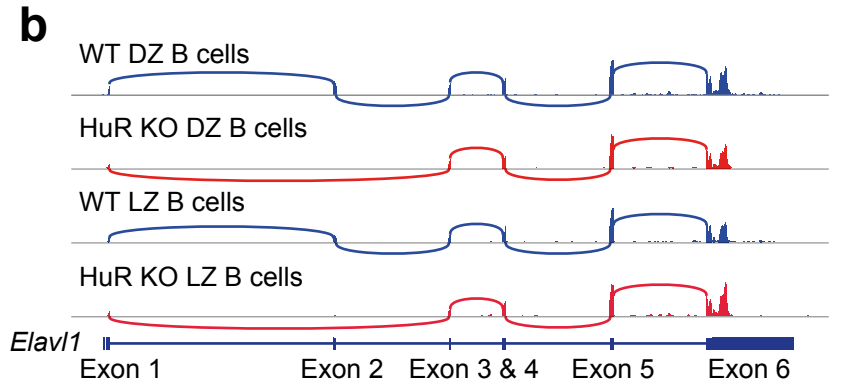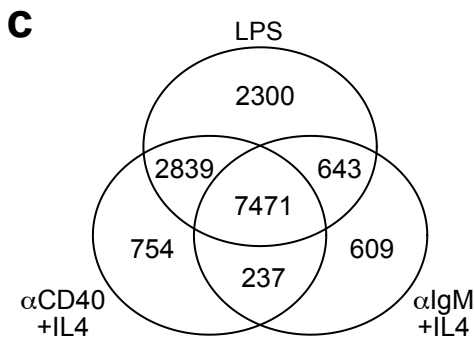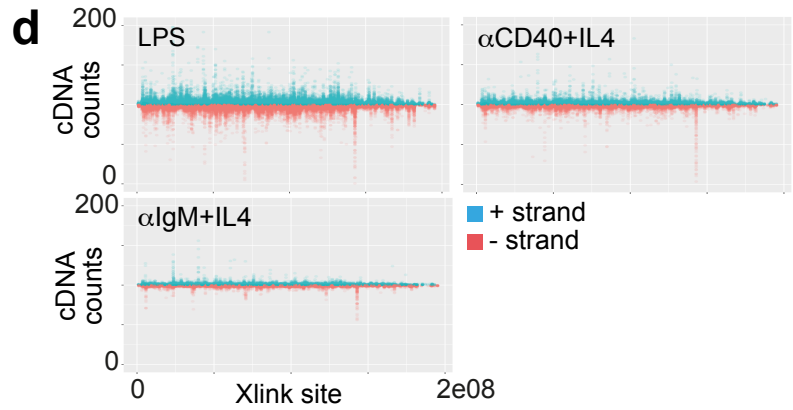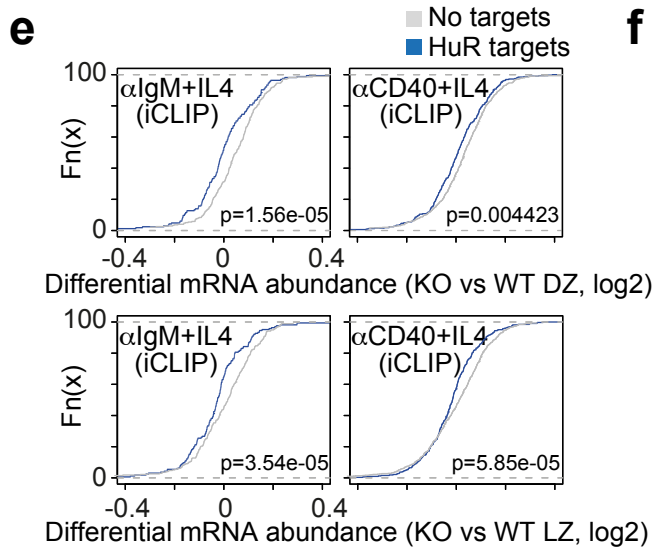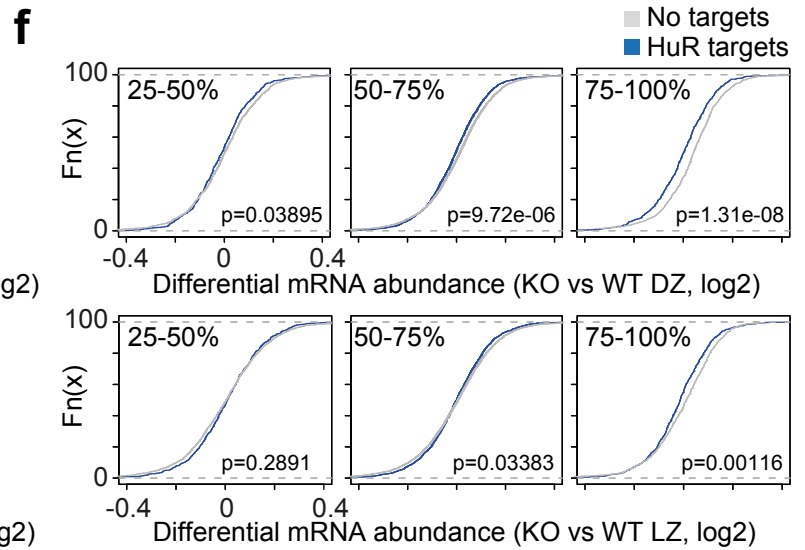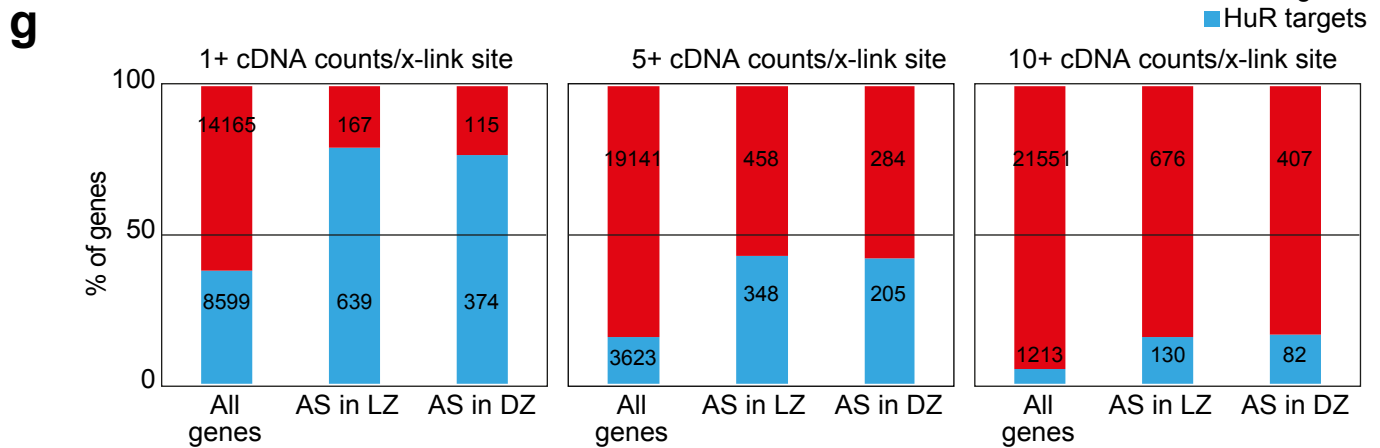

**Supplementary Figure 5. Transcriptomics analysis of DZ and LZ GC HuR KO B cells.**

**a**, Principal component analysis of mRNAseq data from DZ and LZ GC B cells sorted from HuR<sup>fl/fl</sup> (WT) and HuR<sup>fl/fl</sup> AID<sup>Cre</sup> (HuR KO) mice at day 7 after immunisation with NP-KLH in alum (DESeq2). **b**, Visualization as Sashimi plot of exon-exon spanning reads mapped to the *Elavl1* (HuR) gene. **c**, Venn diagram showing the overlap of genes which mRNAs were identified as targets of HuR in iCLIP experiments performed upon B cell stimulation for 48 h. with LPS,  $\alpha$ CD40+IL4 or  $\alpha$ IgM+IL4. **d**, iCLIP data depth represented as the number of unique cDNA counts annotated to each of the HuR crosslink sites identified in the iCLIP assays shown in c. **e**, Cumulative distribution of differential mRNA abundance in DZ KO and LZ KO GC B cells compared to WT cells of HuR mRNA targets and mRNAs not bound with HuR. All mRNA transcripts were merged by gene. Data is divided based on HuR mRNA target detection in the transcript 3'UTR (at least 5- unique cDNA counts per x-link site) in HuR iCLIP assays from B cells stimulated with  $\alpha$ CD40+IL4 or  $\alpha$ IgM+IL4. Data from the top 25% of most expressed genes is shown as in figure 5d (Kolmogorov–Smirnov test). **f**, Cumulative distribution of differential mRNA abundance upon gene clustering based on the expression of HuR mRNA targets to account for iCLIP experimental bias (iCLIP preferential detection of highly expressed genes). Changes in mRNA abundance were subdivided and plotted in equal windows having each a 25% of genes. Data is shown from the less abundant (25-50% window) to the most abundant (75-100% window) (HuR binding was annotated if at least 5- unique cDNA counts per x-link site were detected) (Kolmogorov–Smirnov test). **g**, Percentage and number of genes annotated as alternatively spliced in HuR KO GC B cells that are also targets of HuR. Data were classified based on the number of cDNA counts annotated in each crosslink site.

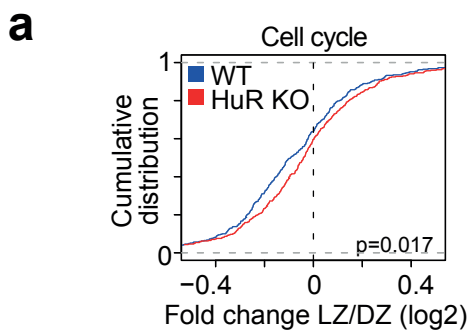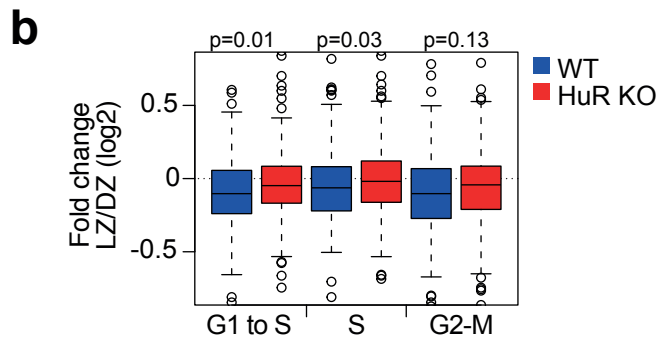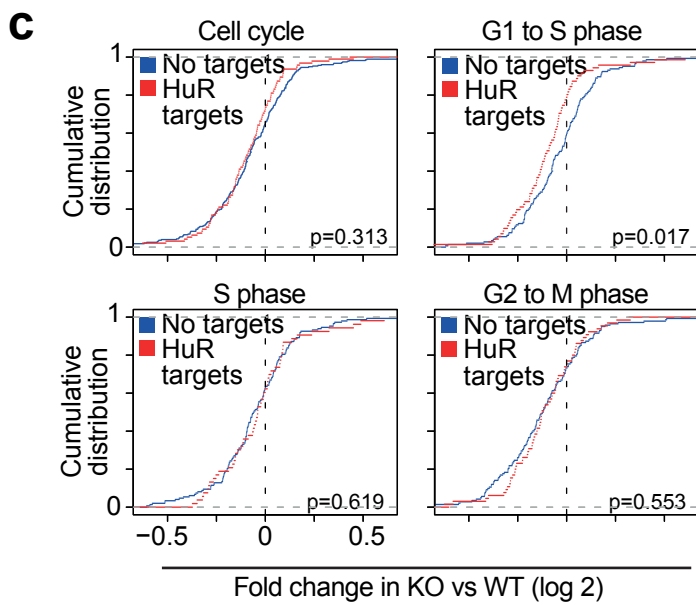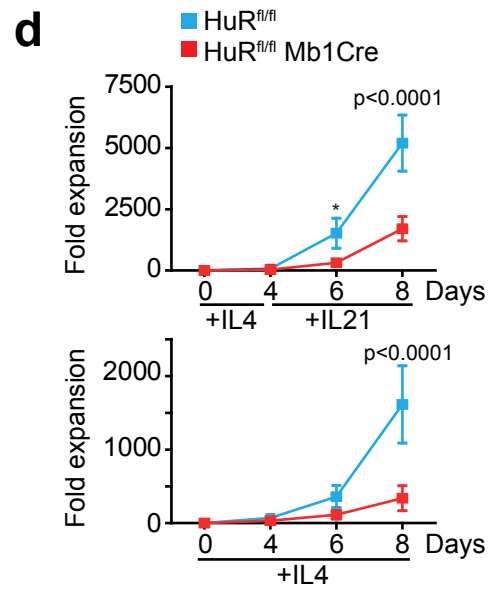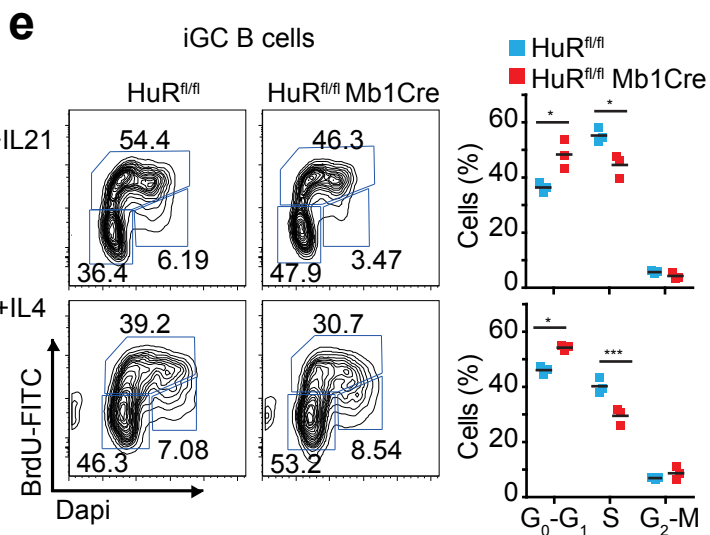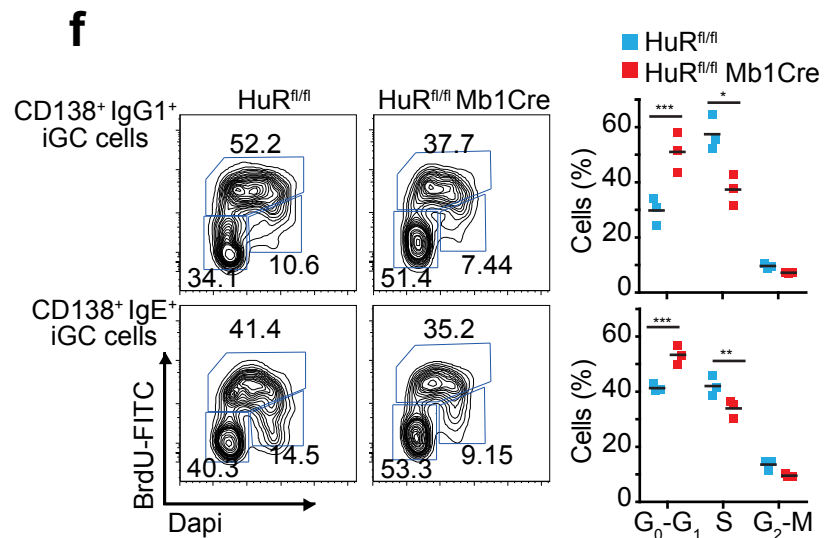

### Supplementary Figure 6. HuR controls cell cycle.

**a**, Cumulative distribution of change in expression of genes associated to the cell cycle in LZ and DZ GC B cells (Kolmogorov–Smirnov test). **b**, Boxplots showing changes in the expression of cell cycle genes classified into G1-early S (n=216 genes), S (n=201 genes) and G2-M (n=207 genes) phases of the cell cycle (n=436 genes, data show the mean, 25-75% range and 5-95% whiskers. Wilcox test). **c**, Cumulative distribution of change in expression in DZ GC B cells of HuR-target genes or not associated to G1-S, S and G2-M phases of the cell cycle (Kolmogorov–Smirnov test). **d**, Expansion of HuR<sup>fl/fl</sup> and HuR<sup>fl/fl</sup> Mb1<sup>Cre</sup> iGC B cells cultured in-vitro for 8 days (representative data from 1 of 3 independent experiments, n=3 mice per group, Data presented as mean values +/- SD, 2-way ANOVA and Tukey post-test, \* p<0.05, \*\*\* p<0.001). **e**, BrdU incorporation in proliferating iGC B cells at day 6 of culture. IGC B cells were supplemented with IL-4 or IL-21. Left panels, representative contour plots of BrdU and DNA content (Dapi) staining. Right panels, percentage of cells in G0-G1, S and G2-M phases of the cell cycle (representative data from 1 of the 3 independent experiments performed, n=3 mice per group, 2-way ANOVA and Tukey post- test, \* p<0.05, \*\*\* p<0.001). **f**, BrdU incorporation in proliferating CD138<sup>+</sup> iGC B cells at day 6. Left panels, representative contour plots of BrdU and DNA content (Dapi) staining. Right panels, percentage of cells in G0-G1, S and G2-M phases (representative data from 1 of the 3 independent experiments performed, n=3 mice per group, 2-way ANOVA and Tukey post- test, \* p<0.05, \*\*\* p<0.001). Source data are provided as a Source Data file.

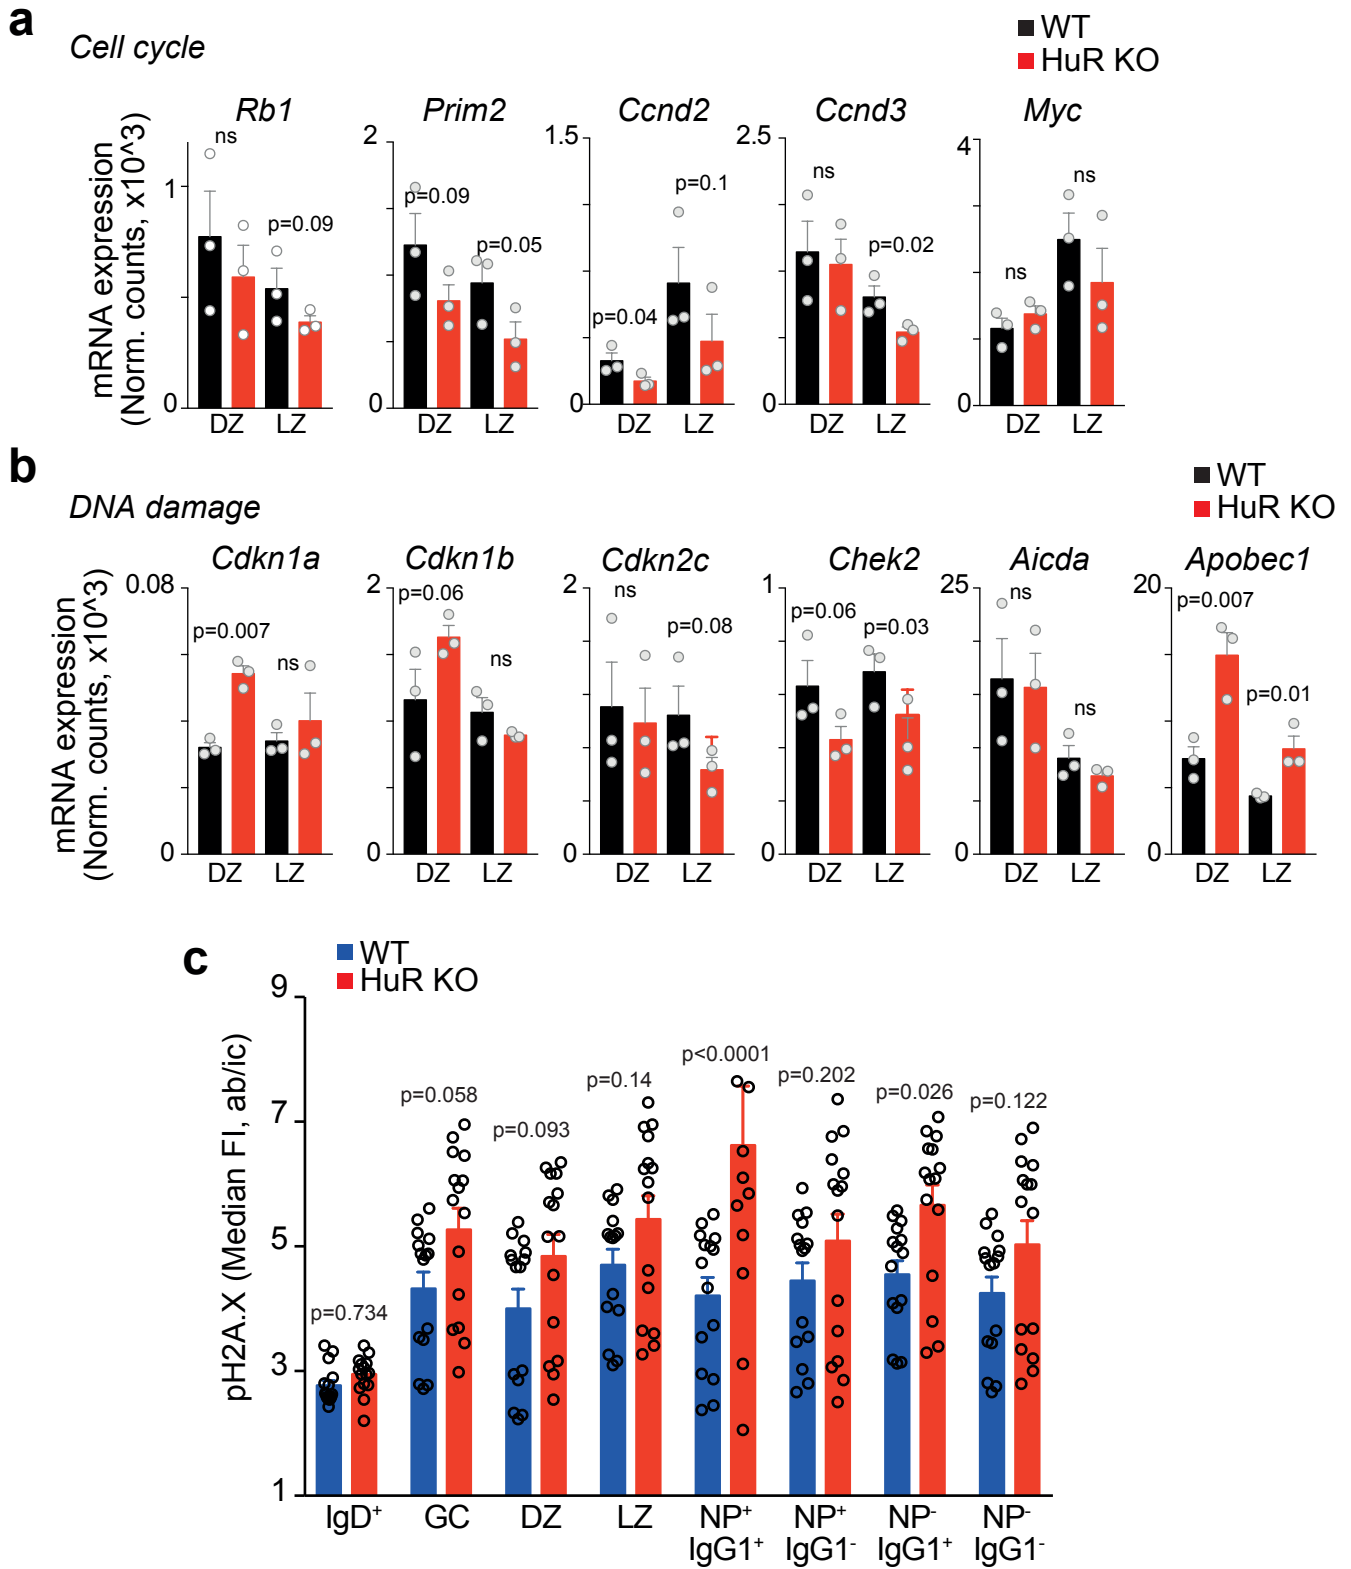

**Supplementary Figure 7. H2A.X phosphorylation is increased in the absence of HuR.**

**a**, Quantitation of the mRNA expression of *Rb1*, *Prim2*, *Ccnd2*, *Ccnd3* and *Myc* in DZ and LZ GC B cells. **b**, Analysis of the expression of DNA damage associated genes *Cdkn1a*, *Cdkn1b*, *Cdkn2c*, *Chk2*, *Aicda* and *Apobec1*. Data in **a** and **b** are collected from n=3 independent samples analysed by mRNAseq and DESeq2 (BH method for adjusted p-value calculation) and presented as mean values +/- SEM. **c**, Median fluorescence intensity of pH2A.X (pS139) shown in Figure 7g. Data from n=15 mice per group collected over 2 independent experiments. Mean  $\pm$  SEM is shown. Mann-Whitney test.

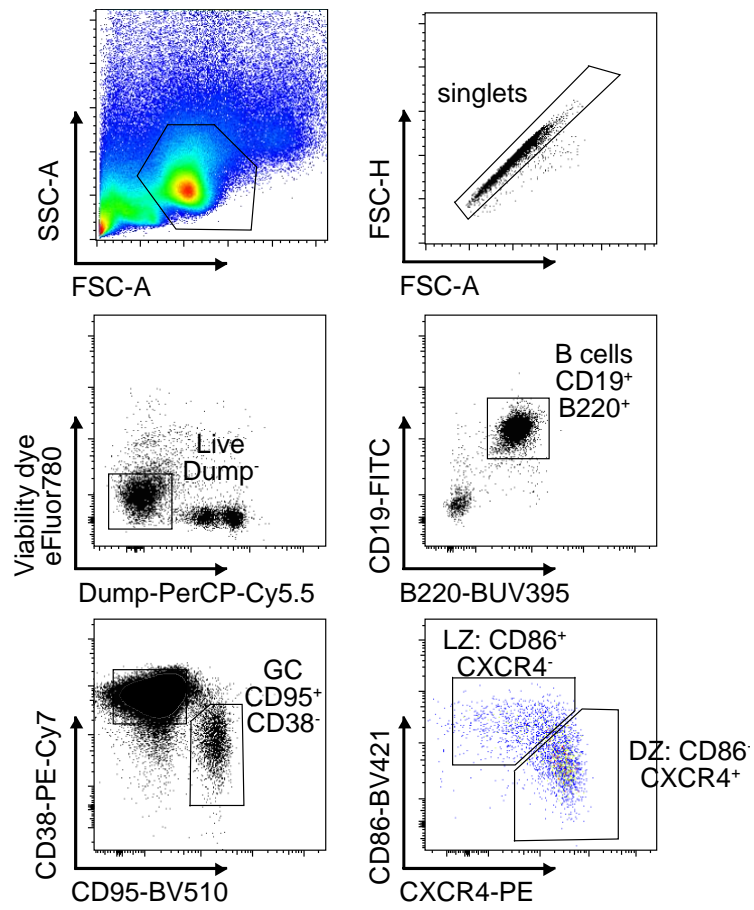

**Supplementary Figure 8. Gating strategy for FACs sorting of DZ and LZ GC B cells for RNAseq.**



**Supplementary Table 1.** List of antibodies.

| Protein detected                      | Source  | Ig type (clone)        | Application | Dilution | Company             | Cat. Numbers.     |
|---------------------------------------|---------|------------------------|-------------|----------|---------------------|-------------------|
| HuR                                   | Mouse   | IgG1 (3A2)             | FC          | 1:1000   | Santa Cruz          | sc-5261           |
| Isotype ab                            | Mouse   | IgG1 (G3A1)            | FC          | 1:1000   | Cell Signaling Tech | 5415S             |
| B-actin                               | Mouse   | IgG1 (AC-15)           | WB          | 1:10000  | Sigma               | A1978             |
| Myc                                   | Rabbit  | IgG (D84C12)           | FC/WB       | 1:100    | Cell Signaling Tech | 5605 and 13871    |
| Rabbit Ig                             | Goat    | IRDye 680 conjugated   | WB          | 1:10000  | LI-COR Biosciences  | P/N 925-68073     |
| Mouse Ig                              | Goat    | IRDye 800CW conjugated | WB          | 1:10000  | LI-COR Biosciences  | P/N 925-32212     |
| B220                                  | Rat     | IgG2a (RA3-6B2)        | FC          | 1:400    | BD Biosciences      | 103206            |
| CD19                                  | Rat     | IgG2a (6D5)            | FC          | 1:400    | BioLegend           | 115505            |
| IgD                                   | Rat     | IgG2a (11-26.2a)       | FC/IF       | 1:400    | BioLegend           | 405718            |
| IgM                                   | Rat     | IgG2a (R6-60.2)        | FC          | 1:100    | BD Biosciences      | 550881 and 564028 |
| IgE                                   | Rat     | IgG1 (RME-1)           | FC          | 1:400    | BioLegend           | 406903            |
| IgG1                                  | Rat     | IgG1 (RMG1-1)          | FC          | 1:500    | BioLegend           | 406615            |
| Ig light chain $\lambda$              | Rat     | IgG (RML-42)           | FC          | 1:400    | BioLegend           | 407307            |
| CD95                                  | Hamster | IgG2 (Jo2)             | FC          | 1:400    | BD Biosciences      | 563646            |
| GL7                                   | Rat     | IgM (GL7)              | FC          | 1:200    | BioLegend           | 144603            |
| CXCR4                                 | Rat     | IgG2b (2B11)           | FC          | 1:100    | BD Biosciences      | 551966            |
| CD38                                  | Rat     | IgG2a (90)             | FC          | 1:400    | BD Biosciences      | 562770            |
| CD86                                  | Rat     | IgG2a (GL1)            | FC          | 1:400    | BD Biosciences      | 564198            |
| CD45.2                                | Mouse   | IgG2a (104)            | FC          | 1:400    | BioLegend           | 109806            |
| CD2                                   | Mouse   | IgG1 (RPA-2.10)        | FC          | 1:200    | BioLegend           | 300203            |
| CD138                                 | Rat     | IgG2a (7E9)            | FC          | 1:800    | BD Biosciences      | 553714            |
| CD21/35                               | Rat     | IgG2a (281-2)          | IF          | 1:400    | BioLegend           | 123405            |
| Ki67                                  | Rat     | IgG2a (SolA15)         | IF          | 1:400    | ThermoScientific    | 50-5698-80        |
| IgM                                   | Rat     | IgG2a (II/41)          | Elisa       | 1:1000   | BD Biosciences      | 553435            |
| IgG1                                  | Rat     | IgG1 (A85-3)           | Elisa       | 1:1000   | BD Biosciences      | 553445            |
| IgM                                   | Rat     | IgG2a (R6-60.2)        | Elisa       | 1:1000   | BD Biosciences      | 553405            |
| IgG1                                  | Rat     | Rat IgG1(A85-1)        | Elisa       | 1:1000   | BD Biosciences      | 553440            |
| IgM                                   | Goat    | IgG polyclonal         | Elisa       | 1:1000   | Southern Biotech    | 3020-08           |
| IgG (H+L)                             | Goat    | IgG polyclonal         | Elisa       | 1:1000   | Southern Biotech    | 3050-08           |
| GFP                                   | Rabbit  | IgG polyclonal         | FC          | 1:500    | ThermoScientific    | A21311            |
| phosphoSer139-H2a.X                   | Mouse   | IgG1(clone 2F3)        | FC          | 1:100    | BioLegend           | 613406            |
| NP-PE                                 | -       | -                      | FC          | 1:1000   | Biosearch Tech      | N-5070-1-BS       |
| NiP-BSA-Biotin                        | -       | -                      | FC          | 1:1000   | Biosearch Tech      | N-1027-5          |
| BrdU                                  | Mouse   | IgG1 (MoBU-1)          | FC          | 1:200    | ThermoScientific    | B35133            |
| CaspACE™ FITC-VAD-FMK In Situ Marker  | -       | -                      | FC          | 1 mM     | Promega             | G7461             |
| CellROX™ Reagent Variety Pack         | -       | -                      | FC          | 1 mM     | ThermoScientific    | C10448            |
| MitoTracker™ Orange CMTMRos           | -       | -                      | FC          | 1 mM     | ThermoScientific    | M7510             |
| MitoTracker™ Orange CM-H2TMRos        | -       | -                      | FC          | 1 mM     | ThermoScientific    | M7511             |
| Molecular Probes MitoTracker Green FM | -       | -                      | FC          | 1 mM     | ThermoScientific    | M7514             |

**Supplementary Table 2.** List of primers.

| <b>Name</b> | <b>Sequence</b>        | <b>Target gene/region</b> | <b>Orientation</b> | <b>Application</b> |
|-------------|------------------------|---------------------------|--------------------|--------------------|
| JH4 forw    | CCTAGGAACCAACTTAAGAGT  | Ig JH4 region             | Forward            | PCR                |
| JH4 rev     | TGGAGTTTTCTGAGCATTGCAG | Ig JH4 region             | Reverse            | PCR                |
