# Supplementary material for: The RNA-binding protein HuR is required for maintenance of the germinal centre response
Source: PubMed Central journal article supplement (PMC8590059; doi:10.1038/s41467-021-26908-2), 2021-11-12
Supplement: 41467_2021_26908_MOESM3_ESM.pdf [file 41467_2021_26908_MOESM3_ESM.pdf]

## **Description of Additional Supplementary Files**

File Name: Supplementary Data 1

Description: mRNAseq analysis by DESeq2.

File Name: Supplementary Data 2

Description: RNA splicing analysis with rMATS.

File Name: Supplementary Data 3

Description: Gene ontology analysis with Toppgene.

File Name: Supplementary Data 4

Description: Curated list of cell cycle genes (from Reactome and (Macosko et al., 2015) classified based on their expression in G1-early S, S or G2-M phases of the cell cycle.
